# Supplementary material
Source: publisher figshare collection journal article supplement (https://frontiersin.figshare.com/ndownloader/files/34023914)
Supplement: Supplementary file [file 34023914]

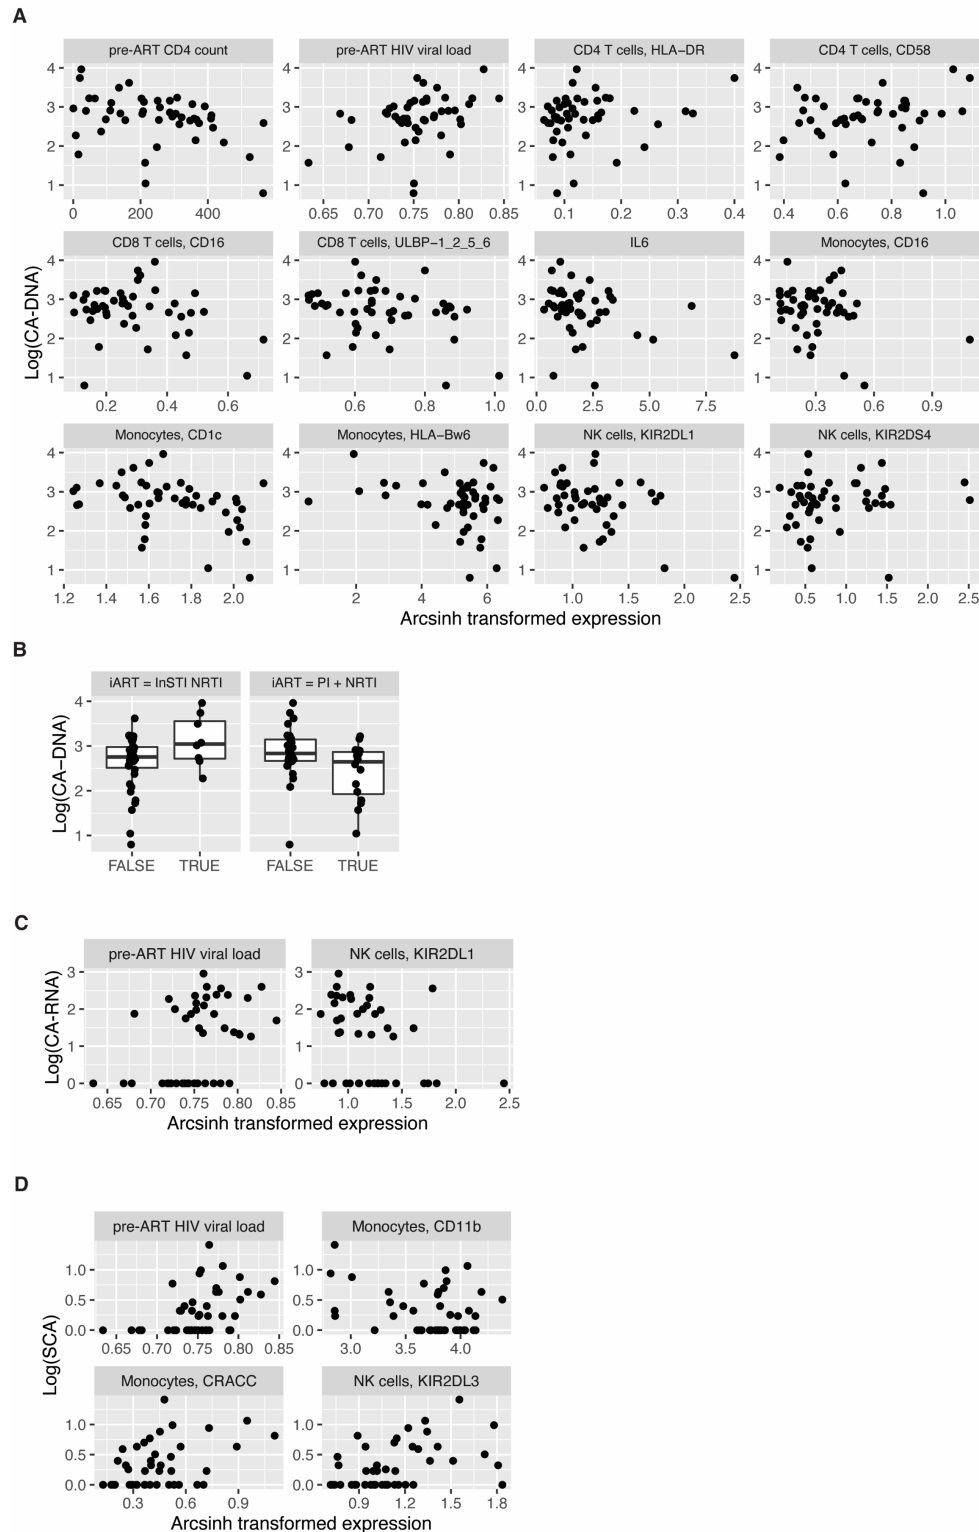

**Supplemental figure 3. Associations between variables selected by the LASSO and CA-DNA, CA-RNA, or SCA. (A) Scatterplots showing variables selected by LASSO for CA-DNA. (B) Boxplots showing variables selected by LASSO for CA-DNA. (C) Scatterplots showing variables selected by LASSO for CA-RNA. (D) Scatterplots showing variables selected by LASSO for SCA.**
